# Supplementary material
Source: MDPI journal article supplement (https://www.mdpi.com/search?q=bioengineering-07-00005)
Supplement: s001 [file bioengineering-07-00005-s001.pdf]

Article

# Antioxidant and Antibacterial Peptides from Soybean Milk through Enzymatic- and Membrane-Based Technologies

Arijit Nath <sup>1,2</sup>, Geremew Geidare Kailo <sup>1</sup>, Zsuzsanna Mednyánszky <sup>3</sup>, Gabriella Kiskó <sup>4</sup>, Barbara Csehi <sup>5</sup>, Klára Páztorné-Huszár <sup>5</sup>, Renáta Gerencsér-Berta <sup>2</sup>, Ildikó Galambos <sup>2</sup>, Emília Pozsgai <sup>2</sup>, Szilvia Bánvölgyi <sup>1</sup> and Gyula Vatai <sup>1,\*</sup>

<sup>1</sup> Department of Food Engineering, Faculty of Food Science, Szent István University, Ménesi st 44, Budapest, HU-1118, Hungary; arijit0410@etk.szie.hu (A.N.); geidaregeremew@gmail.com (G.G.K.); szbanvolgyi.uni.szie@gmail.com (S.B.);

<sup>2</sup> Soós Ernő Water Technology Research and Development Center, University of Pannonia, Zrínyi M. u. 18, H-8800 Nagykanizsa, Hungary; berta.renata@sooswrc.hu (R. G-B.); galambos.ildiko@sooswrc.hu (I.G.); pozsgai.emilia@sooswrc.hu (E.P.);

<sup>3</sup> Department of Food Chemistry and Nutrition, Faculty of Food Science, Szent István University, Budapest, Somlói st 14-16, Budapest, HU-1118, Hungary; Mednyanszky.Zsuzsanna@etk.szie.hu;

<sup>4</sup> Department of Food Microbiology and Biotechnology, Faculty of Food Science, Szent István University, Budapest, Somlói st 14-16, Budapest, HU-1118, Hungary; Kisko.Gabriella@etk.szie.hu;

<sup>5</sup> Department of Refrigeration and Livestock Product Technology, Faculty of Food Science, Szent István University, Ménesi st 43-45, Budapest, HU-1118, Hungary; Csehi.Barbara@etk.szie.hu (B.C.); Pasztorne.Huszar.Klara@etk.szie.hu (K. P-H.);

\* Correspondence: Vatai.Gyula@etk.szie.hu; Tel.: +3613057112; Fax: +36-1-305-6323

## Supplementary Materials

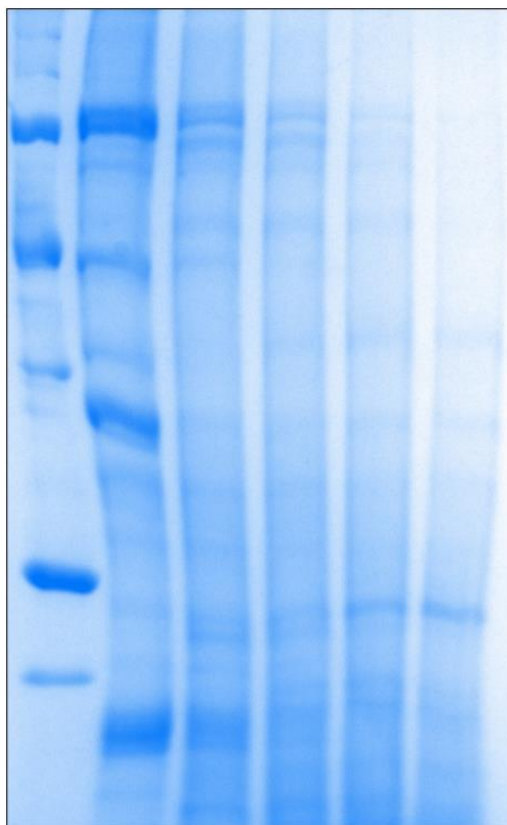

**Figure S1.** Image of polyacrylamide gel electrophoresis of native soybean milk and enzyme-hydrolyzed soybean milks.
